# Supplementary material
Source: publisher figshare collection journal article supplement (https://acs.figshare.com/ndownloader/files/4575403)
Supplement: Supplementary file 1 [file 4575403]

**Ionic Liquid-Supported (ILS) (S)-Pyrrolidine Sulfonamide, a Recyclable  
Organocatalyst for the Highly Enantioselective Michael Addition to Nitroolefins**

Bukuo Ni,\* Qianying Zhang, Kritanjali Dhungana, and Allan D. Headley\*

*Department of Chemistry, Texas A&M University-Commerce, Commerce, TX 75429-  
3011, USA*

bukuo\_ni@tamuc.edu

**Supporting Information**

Table of contents

|                                                         |         |
|---------------------------------------------------------|---------|
| Synthesis of catalyst <b>1c</b> .....                   | S2-S3   |
| The data of Michael addition reaction.....              | S3-S7   |
| References.....                                         | S7      |
| Spectra of chiral pyridinium ionic liquids.....         | S8-S11  |
| Spectra of chiral HPLC for compounds <b>4a-4m</b> ..... | S12-S23 |

**General Information:** Commercial reagents were used as received, unless otherwise stated. Merck 60 silica gel was used for chromatography, and Whatman silica gel plates with fluorescence UV<sub>254</sub> were used for thin-layer chromatography (TLC) analysis. <sup>1</sup>H and <sup>13</sup>C NMR spectra were recorded on the Bruker Avance 400. The data of Elemental Analysis were obtained from Quantitative Technologies INC.

All the compounds synthesized (shown in Table 3) in the manuscript are known compounds.<sup>2-7</sup> Their relative and absolute configurations of the products were determined by comparison with the known <sup>1</sup>H and <sup>13</sup>C NMR, chiral HPLC analysis, and optical rotation values.

### 1. Synthesis of compound 3

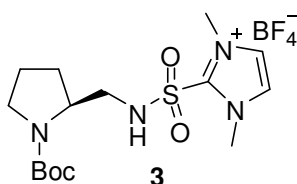

To a solution of (S)-2-amino-1-N-Boc-pyrrolidine (660 mg, 3.3 mmol) and Et<sub>3</sub>N (364 mg, 3.6 mmol) in CH<sub>2</sub>Cl<sub>2</sub> (5 mL) was added 1-methyl-2-sufonylchlorideimidazole<sup>1</sup> (596 mg, 3.3 mmol) in CH<sub>2</sub>Cl<sub>2</sub> (2 mL) at 0°C. After addition, the reaction mixture was warmed up to room temperature and continued to stirring for 1 h. Then water was added and the reaction mixture was extracted with CH<sub>2</sub>Cl<sub>2</sub>, the organic phase was dried over Na<sub>2</sub>SO<sub>4</sub>. Filtration, removal of the solvent, and purification by falsh column chromatography (eluent: ethyl acetate) afforded the product **2** (1.1 g, 96%). This compound was used for the next step directly without further characterization.

To a solution of compound **2** (584 mg, 1.70 mmol) in AcOEt (5 mL) was added Me<sub>3</sub>OBF<sub>4</sub> (251 mg, 1.70 mmol) at 0°C. After addition, the reaction mixture was warmed up to room temperature and continued to stirring for 2 h. The solid was precipitated, filtrated, and dried to give product **3** (679 mg, 90%) as a white solid. mp: 138-140°C; [α]<sub>D</sub><sup>20</sup> = -47.2° (c = 0.25, MeOH); <sup>1</sup>H NMR (400 MHz, CD<sub>3</sub>OD) δ 7.75 (s, 2H), 4.11 (s, 6H), 3.90 and 3.70 (br, 1H), 3.40-3.10 (m, 4H), 2.05-1.78 (m, 4H), 1.43 (br, 9H); <sup>13</sup>C NMR (100 MHz, CD<sub>3</sub>OD) δ 156.7, 141.2, 140.1, 127.3, 126.9, 81.6, 81.1, 61.2, 58.5,

58.1, 47.0, 46.3, 45.9, 44.3, 39.0, 29.4, 29.1, 28.7, 27.2, 24.4, 23.7; anal calcd for C<sub>15</sub>H<sub>27</sub>BF<sub>4</sub>N<sub>4</sub>O<sub>2</sub>S: C 40.37, H 6.10, N 12.55; Found: C 40.52, H 6.31, N 12.41.

## 2. Synthesis of catalyst **1c**

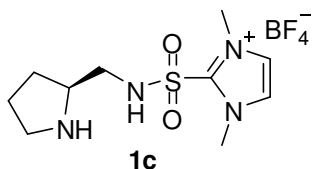

The obtained product **3** (500 mg, 1.23 mmol) was added 4 M HCl dioxane solution (5 mL). The reaction was stirred at room temperature for 5 h and removed the solvent to give the hydrogen chloride salts, which was dissolved in methanol and neutralized with NaHCO<sub>3</sub> solid. Removal the solvent left a residue, which was further purified by short column chromatography on basic aluminum oxide (eluent: methanol) to remove the inorganic salt and give product **1c** (403 mg, 95%) as a white solid. mp: 147-148°C; [ $\alpha$ ]<sub>D</sub><sup>20</sup> = 4.5° (c = 0.31, MeOH); <sup>1</sup>H NMR (400 MHz, CD<sub>3</sub>OD)  $\delta$  7.53 and 7.50 (s, 2H), 4.06 (s, 6H), 3.70-3.50 (m, 1H), 3.36-2.90 (m, 4H), 2.20-1.90 (m, 3H), 1.78-1.64 (m, 1H); <sup>13</sup>C NMR (100 MHz, CD<sub>3</sub>OD)  $\delta$  148.11, 124.7, 124.6, 113.2, 63.1, 46.9, 46.5, 38.1, 37.9, 30.7, 29.2, 28.4, 24.8, 24.4; anal calcd for C<sub>10</sub>H<sub>19</sub>BF<sub>4</sub>N<sub>4</sub>O<sub>2</sub>S: C 34.70, H 5.53, N 16.19; Found: C 34.58, H 5.62, N 16.32.

## The general procedure for the Michael addition reaction

### 3. (*S*)-2-((*R*)-2-nitro-1-phenylethyl)cyclohexanone **4a**<sup>2</sup>

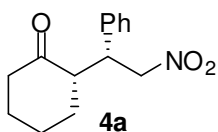

The catalyst **1c** (7 mg, 10 mol%) was added to a solution of cyclohexanone (98 mg, 1.0 mmol) in *i*-PrOH (0.5 mL) at room temperature. The reaction mixture was stirred for 20 min, and then *trans*- $\beta$ -nitrostyrene (30 mg, 0.2 mmol) was added. After stirring at room temperature for 16 h, the reaction mixture was concentrated in vacuum and the residue was diluted with ethyl acetate (or ether) to precipitate the catalyst. The organic layer was separated and purified by flash silica gel column (eluent: hexane : ethyl acetate = 4 : 1) to give the Michael adduct **4a** (45 mg, 91%) as a white solid. The catalyst was recovered and reused for the next cycle. <sup>1</sup>H NMR (400 MHz, CDCl<sub>3</sub>)  $\delta$  7.35-7.23 (m, 3H), 7.20-7.14 (m, 2H), 4.94 (dd, *J* = 12.4 and 4.4 Hz, 1H), 6.43 (dd, *J* = 12.4 and 10.0 Hz, 1H), 3.76 (dt, *J* = 9.6 and 4.4 Hz, 1H), 2.74-2.64 (m, 1H), 2.52-2.34 (m, 2H), 2.13-2.03 (m, 1H), 1.83-1.50 (m, 4H), 1.30-1.18 (m, 1H); *syn/anti* =

95/5; ee = 90%; HPLC (Chiralpak AS-H, i-Propanol/Hexane = 10/90, flow rate 0.7 mL/min,  $\lambda$  = 238 nm):  $t_{\text{minor}}$  = 18.2 min,  $t_{\text{major}}$  = 27.5 min.

4. (S)-2-((R)-1-(4-methylphenyl)-2-nitroethyl)cyclohexanone **4b**<sup>3</sup>

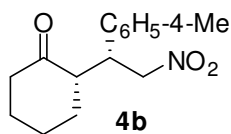

<sup>1</sup>H NMR (400 MHz, CDCl<sub>3</sub>)  $\delta$  7.12 (d,  $J$  = 8.0 Hz, 2H), 7.04 (d,  $J$  = 8.0 Hz, 2H), 4.91 (dd,  $J$  = 12.4 and 4.8 Hz, 1H), 4.62 (dd,  $J$  = 12.4 and 10.0 Hz, 1H), 3.72 (dt,  $J$  = 10.0 and 4.8 Hz, 1H), 2.71-2.62 (m, 1H), 2.51-2.32 (m, 2H), 2.31 (s, 3H), 2.12-2.02 (m, 1H), 1.82-1.50 (m, 4H), 1.30-1.18 (m, 1H); *syn/anti* = 99/1; ee = 99%; HPLC (Chiralpak AS-H, i-Propanol/Hexane = 10/90, flow rate 0.8 mL/min,  $\lambda$  = 254 nm):  $t_{\text{minor}}$  = 12.4 min,  $t_{\text{major}}$  = 20.6 min.

5. (S)-2-((R)-1-(4-methoxyphenyl)-2-nitroethyl)cyclohexanone **4c**<sup>2</sup>

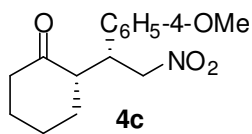

<sup>1</sup>H NMR (400 MHz, CDCl<sub>3</sub>)  $\delta$  7.08 (d,  $J$  = 8.8 Hz, 2H), 6.83 (d,  $J$  = 8.8 Hz, 2H), 4.95 (dd,  $J$  = 12.4 and 4.4 Hz, 1H), 4.58 (dd,  $J$  = 12.4 and 10.0 Hz, 1H), 3.78 (s, 3H), 3.72 (dt,  $J$  = 10.0 and 4.4 Hz, 1H), 2.69-2.60 (m, 1H), 2.53-2.33 (m, 2H), 2.13-2.04 (m, 1H), 1.82-1.50 (m, 4H), 1.30-1.17 (m, 1H); *syn/anti* = 99/1; ee = 98%. HPLC (Chiralpak AD, i-Propanol/Hexane = 10/90, flow rate 0.5 mL/min,  $\lambda$  = 254 nm):  $t_{\text{minor}}$  = 26.9 min,  $t_{\text{major}}$  = 32.7 min.

6. (S)-2-((R)-1-(2-trifluoromethanophenyl)-2-nitroethyl)cyclohexanone **4d**<sup>4</sup>

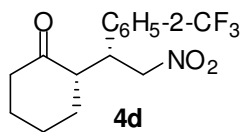

<sup>1</sup>H NMR (400 MHz, CDCl<sub>3</sub>)  $\delta$  7.69 (d,  $J$  = 7.6 Hz, 1H), 7.56 (t,  $J$  = 7.6 Hz, 1H), 7.39 (dd,  $J$  = 16.4 and 10.0 Hz, 2H), 5.02 (dd,  $J$  = 12.0 and 6.8 Hz, 1H), 4.76 (dd,  $J$  = 12.0 and 4.0 Hz, 1H), 4.13-4.05 (m, 1H), 3.06-2.96 (m, 1H), 2.54-2.40 (m, 3H), 2.18-2.08 (m, 1H), 1.84-1.52 (m, 4H), 1.38-1.24 (m, 1H); *syn/anti* 98/2; ee = 95%; HPLC

(Chiralpak AD, i-Propanol/Hexane = 10/90, flow rate 0.5 mL/min,  $\lambda$  = 254 nm):  $t_{\text{minor}}$  = 13.7 min,  $t_{\text{major}}$  = 18.6 min.

7. **(S)-2-((R)-1-(4-bromophenyl)-2-nitroethyl)cyclohexanone 4e**<sup>5</sup>

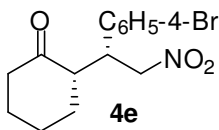

<sup>1</sup>H NMR (400 MHz, CDCl<sub>3</sub>)  $\delta$  7.45 (dd,  $J$  = 6.8 and 1.6 Hz, 2H), 7.06 (dd,  $J$  = 6.8 and 1.6 Hz, 2H), 4.92 (dd,  $J$  = 12.4 and 4.4 Hz, 1H), 4.60 (dd,  $J$  = 12.4 and 10.0 Hz, 1H), 3.74 (dt,  $J$  = 9.6 and 4.4 Hz, 1H), 2.70-2.60 (m, 1H), 2.52-2.32 (m, 2H), 2.14-2.04 (m, 1H), 1.84-1.52 (m, 4H), 1.30-1.18 (m, 1H); *syn/anti* = 93/7; ee = 94%; HPLC (Chiralpak AS-H, i-Propanol/Hexane = 10/90, flow rate 1 mL/min,  $\lambda$  = 254 nm):  $t_{\text{minor}}$  = 15.5 min,  $t_{\text{major}}$  = 27.1 min.

8. **(S)-2-((R)-2-nitro-(2-nitrophenyl)ethyl)cyclohexanone 4f**<sup>6</sup>

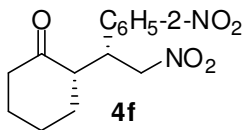

<sup>1</sup>H NMR (400 MHz, CDCl<sub>3</sub>)  $\delta$  7.84 (d,  $J$  = 8.0 Hz, 1H), 7.59 (t,  $J$  = 8.0 Hz, 1H), 7.48-7.42 (m, 2H), 4.98-4.87 (m, 2H), 4.32 (dt,  $J$  = 8.8 and 4.8 Hz, 1H), 2.99-2.91 (m, 1H), 2.52-2.32 (m, 2H), 2.16-2.08 (m, 1H), 1.88-1.78 (m, 2H), 1.72-1.40 (m, 4H); *syn/anti* = 97/3; ee = 90%; HPLC (Chiralpak AD, i-Propanol/Hexane = 5/95, flow rate 1 mL/min,  $\lambda$  = 238 nm):  $t_{\text{minor}}$  = 20.1 min,  $t_{\text{major}}$  = 29.3 min.

9. **(S)-2-((R)-1-(2,4-dichlorophenyl)-2-nitroethyl)cyclohexanone 4g**<sup>6</sup>

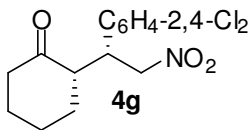

<sup>1</sup>H NMR (400 MHz, CDCl<sub>3</sub>)  $\delta$  7.41 (d,  $J$  = 2.0 Hz, 1H), 7.28-7.14 (m, 2H), 4.95-4.80 (m, 2H), 4.25 (dt,  $J$  = 9.6 and 4.8 Hz, 1H), 2.93-2.82 (m, 1H), 2.52-2.32 (m, 2H), 2.16-2.07 (m, 1H), 1.87-1.50 (m, 4H), 1.40-1.25 (m, 1H); *syn/anti* = 99/1; ee = 99%; HPLC (Chiralpak AS-H, i-Propanol/Hexane = 5/95, flow rate 1 mL/min,  $\lambda$  = 238 nm):  $t_{\text{minor}}$  = 14.3 min,  $t_{\text{major}}$  = 25.5 min.

10. **(R)-Tetrahydro-3-((R)-2-nitro-1-phenylethyl)thiopyran-4-one 4h**<sup>5</sup>

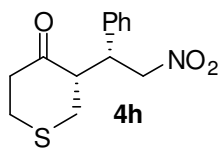

<sup>1</sup>H NMR (400 MHz, CDCl<sub>3</sub>)  $\delta$  7.37-7.26 (m, 3H), 7.21-7.16 (m, 2H), 4.96 (dd,  $J$  = 12.4 and 4.8 Hz, 1H), 4.64 (dd,  $J$  = 12.4 and 10.0 Hz, 1H), 4.20-4.10 (m, 1H), 3.87-3.68 (m, 2H), 3.70 (dd,  $J$  = 11.2 and 5.2 Hz, 1H), 3.27 (dd,  $J$  = 11.2 and 10.0 Hz, 1H), 2.93-2.83 (m, 1H), 2.73-2.61 (m, 1H), 2.60-2.53 (m, 1H); *syn/anti* = 96/4; ee = 92%; HPLC (Chiralpak AS-H, i-Propanol/Hexane = 40/60, flow rate 0.5 mL/min,  $\lambda$  = 254 nm):  $t_{\text{minor}}$  = 21.8 min,  $t_{\text{major}}$  = 27.7 min.

11. **(R)-Tetrahydro-3-((R)-2-nitro-1-phenylethyl)pyran-4-one 4i**<sup>5</sup>

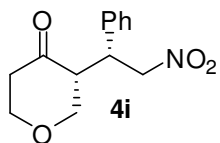

<sup>1</sup>H NMR (400 MHz, CDCl<sub>3</sub>)  $\delta$  7.37-7.26 (m, 3H), 7.21-7.16 (m, 2H), 4.96 (dd,  $J$  = 12.4 and 4.8 Hz, 1H), 4.64 (dd,  $J$  = 12.4 and 10.0 Hz, 1H), 4.20-4.10 (m, 1H), 3.87-3.68 (m, 2H), 3.70 (dd,  $J$  = 11.2 and 5.2 Hz, 1H), 3.27 (dd,  $J$  = 11.2 and 10.0 Hz, 1H), 2.93-2.83 (m, 1H), 2.73-2.61 (m, 1H), 2.60-2.53 (m, 1H); *syn/anti* 94/6; ee = 93%; HPLC (Chiralpak AS-H, i-Propanol/Hexane = 50/50, flow rate 0.5 mL/min,  $\lambda$  = 254 nm):  $t_{\text{minor}}$  = 18.7 min,  $t_{\text{major}}$  = 22.7 min.

12. **(S)-2-((S)-1-(furan-2-yl)-2-nitroethyl)cyclohexanone 4j**<sup>7</sup>

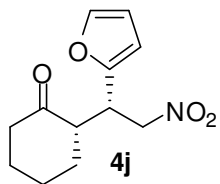

<sup>1</sup>H NMR (400 MHz, CDCl<sub>3</sub>)  $\delta$  (ppm) 7.34 (d,  $J$  = 1.2 Hz, 1H), 6.28 (dd,  $J$  = 2.8, 2.1 Hz, 1H), 6.17 (dd, 1H), 4.78 (dd,  $J$  = 12.5 and 4.8 Hz, 1H), 4.67 (dd,  $J$  = 12.5 and 9.2 Hz, 1H), 3.97 (dt,  $J$  = 9.1, 4.7 Hz, 1H), 2.78-2.71 (m, 1H), 2.49-2.44 (m, 1H), 2.40-2.32 (m, 1H), 2.13-2.07 (m, 1H), 1.86-1.82 (m, 1H), 1.79-1.73 (m, 1H), 1.71-1.61 (m, 2H), 1.33-1.23 (m, 1H). *syn/anti* 92/8; ee = 80%; HPLC (Chiralpak AS-H, i-Propanol/Hexane = 10/90, flow rate 0.7 mL/min,  $\lambda$  = 220 nm):  $t_{\text{major}}$  = 14.4 min,  $t_{\text{major}}$  = 17.6 min.

13. **(R)-5-nitro-4-phenylpentan-2-one 2l**<sup>8</sup>

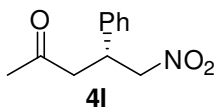

<sup>1</sup>H NMR (400 MHz, CDCl<sub>3</sub>) δ 7.38-7.20 (m, 5H), 4.69 (dd, *J* = 12.4 and 6.8 Hz, 1H), 4.60 (dd, *J* = 12.4 and 7.6 Hz, 1H), 4.04-3.96 (m, 1H), 2.92 (d, *J* = 7.2 Hz, 2H), 2.12 (s, 3H); <sup>13</sup>C NMR (100 MHz, CDCl<sub>3</sub>) δ 205.3, 138.8, 129.1, 127.9, 127.4, 79.4, 46.1, 39.0, 30.4; ee = 14%; HPLC (Chiralpak AS-H, i-Propanol/Hexane = 20/80, flow rate 0.5 mL/min, λ = 254 nm): t<sub>minor</sub> = 30.4 min, t<sub>major</sub> = 41.2 min.

14. **(R)-2,2-dimethyl-4-nitro-3-phenylbutanal 4m**<sup>5</sup>

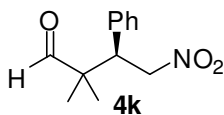

<sup>1</sup>H NMR (400 MHz, CDCl<sub>3</sub>): δ 9.50 (s, 1H), 7.40-7.15 (m, 5H), 4.83 (dd, *J* = 13.0 and 11.4 Hz, 1H), 4.67 (dd, *J* = 13.0 and 4.0 Hz, 1H), 3.76 (dd, *J* = 11.4 and 4.0 Hz, 1H), 1.11 (s, 3H), 0.98 (s, 3H). ee = 76%; HPLC (Chiralpak AS-H, i-Propanol/Hexane = 5/95, flow rate 0.5 mL/min, λ = 238 nm): t<sub>major</sub> = 32.2 min, t<sub>major</sub> = 33.5 min.

**References:**

1. Diltz, S.; Aguirre, G.; Ortega, F.; Walsh, P. J. *Tetrahedron: Asymmetry* **1997**, 8, 3559
2. Ishii, T.; Fujioka, S.; Sekiguchi, Y.; Kotsuki, H. *J. Am. Chem. Soc.* **2004**, 126, 9558.
3. Saraswathy, V. G.; Sankararaman, S. *J. Org. Chem.* **1995**, 60, 5024.
4. Betancort, J. M.; Sakthivel, K.; Thayumanavan, R.; Tanaka, F.; Barbas III, C. F. *Synthesis* **2004**, 1509.
5. Wang, J.; Li, H.; Lou, B.; Zu, L.; Guo, H.; Wang, W. *Chem. Eur. J.* **2006**, 12, 4321.
6. Cao, C-L.; Ye, M-C.; Sun, X-L.; Tang, Y. *Org. Lett.* **2006**, 8, 2901.
7. Pansare, S. V.; Pandya, K. *J. Am. Chem. Soc.* **2006**, 128, 9624-9625.
8. Halland, N.; Hazell, R. G.; Jørgensen, K. A. *J. Org. Chem.* 2002, **67**, 8331.

Automation directory: /export/home/buni/vnmrsys/data/auto\_2006.06.22  
File : exp  
Sample id : tmpstudy  
Sample : N-4-91-2

Pulse Sequence: s2pul

Solvent: cd3od  
Temp. 25.0 C / 298.1 K  
Operator: buni  
VNMRS-400 "nmr400"

Relax. delay 1.000 sec  
Pulse 45.0 degrees  
Acq. time 2.049 sec  
Width 6410.3 Hz  
8 repetitions  
OBSERVE H1, 399.7404915 MHz  
DATA PROCESSING  
Line broadening 0.2 Hz  
FT size 65536  
Total time 0 min, 30 sec

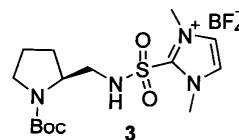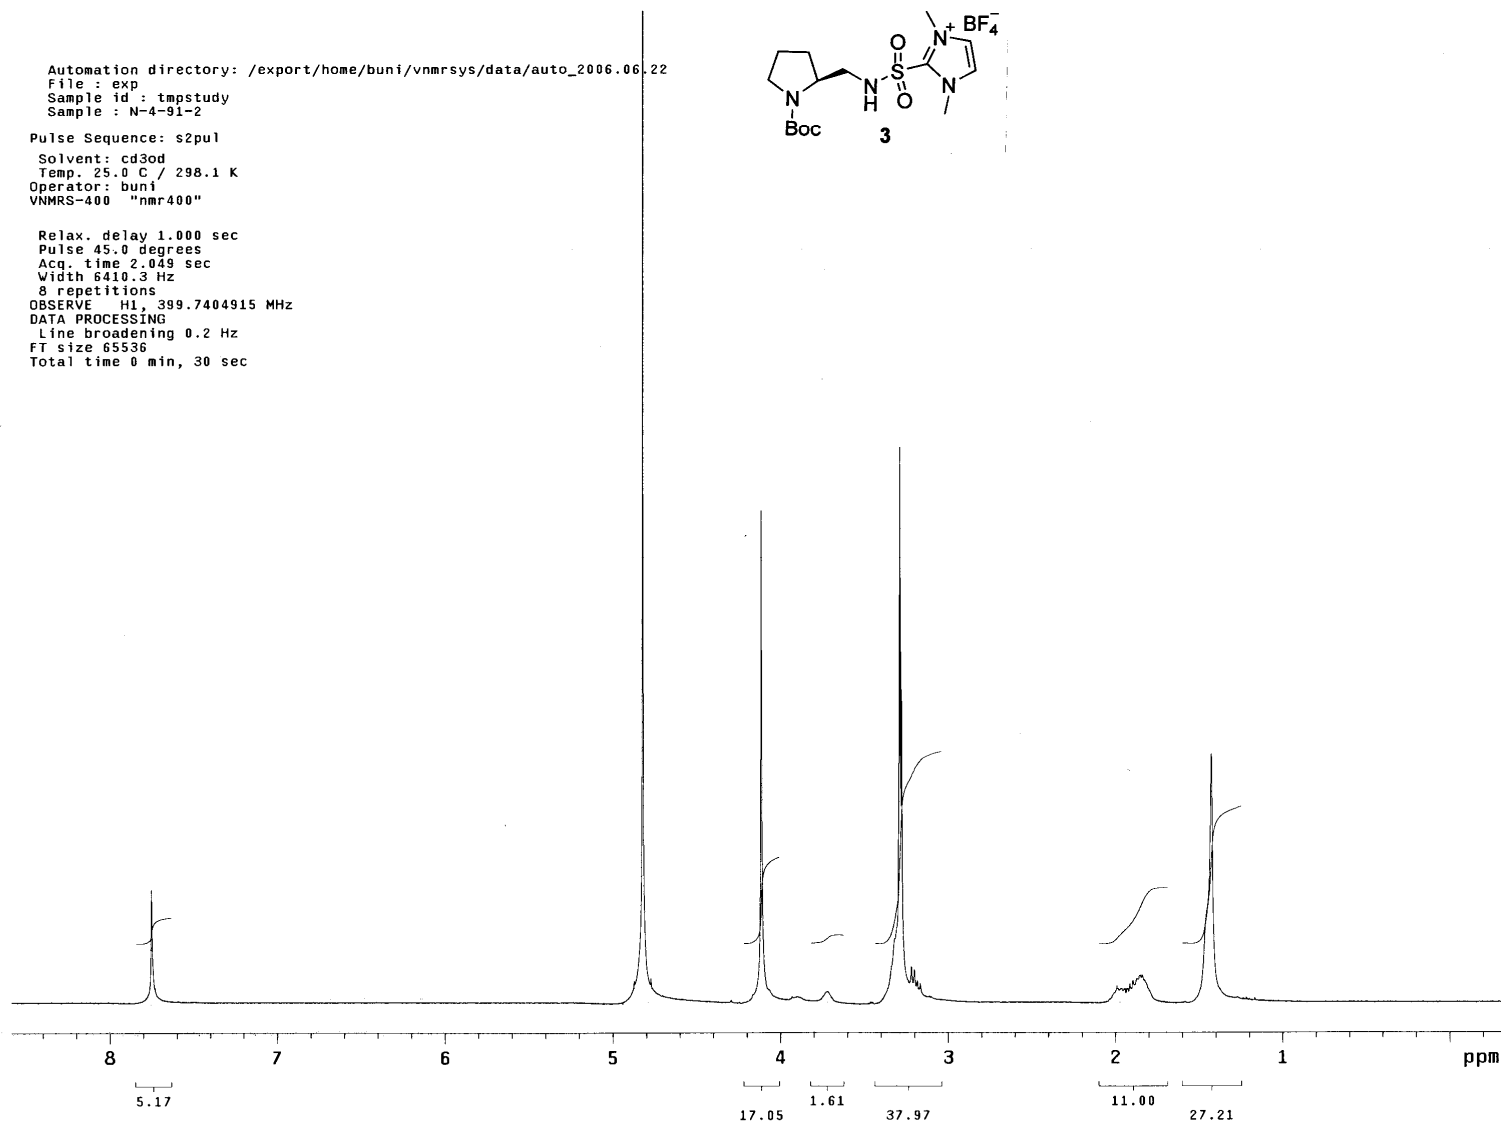



Automation directory: /export/home/buni/vnmrsys/data/auto\_2006.06.2  
 File : exp  
 Sample id : tmpstudy  
 Sample : N-4-97-1

Pulse Sequence: s2pul

Solvent: cd3od

Temp. 25.0 C / 298.1 K

Operator: buni

VNMRS-400 "nmr400"

Relax. delay 1.000 sec

Pulse 45.0 degrees

Acq. time 1.300 sec

Width 24509.8 Hz

100000 repetitions

OBSERVE C13, 100.5146854 MHz

DECOUPLE H1, 399.7424905 MHz

Power 38 dB

continuously on

VALTZ-16 modulated

DATA PROCESSING

Line broadening 0.5 Hz

FT size 65536

Total time 64 hr, 9 min, 0 sec

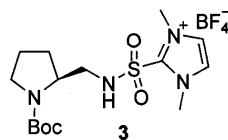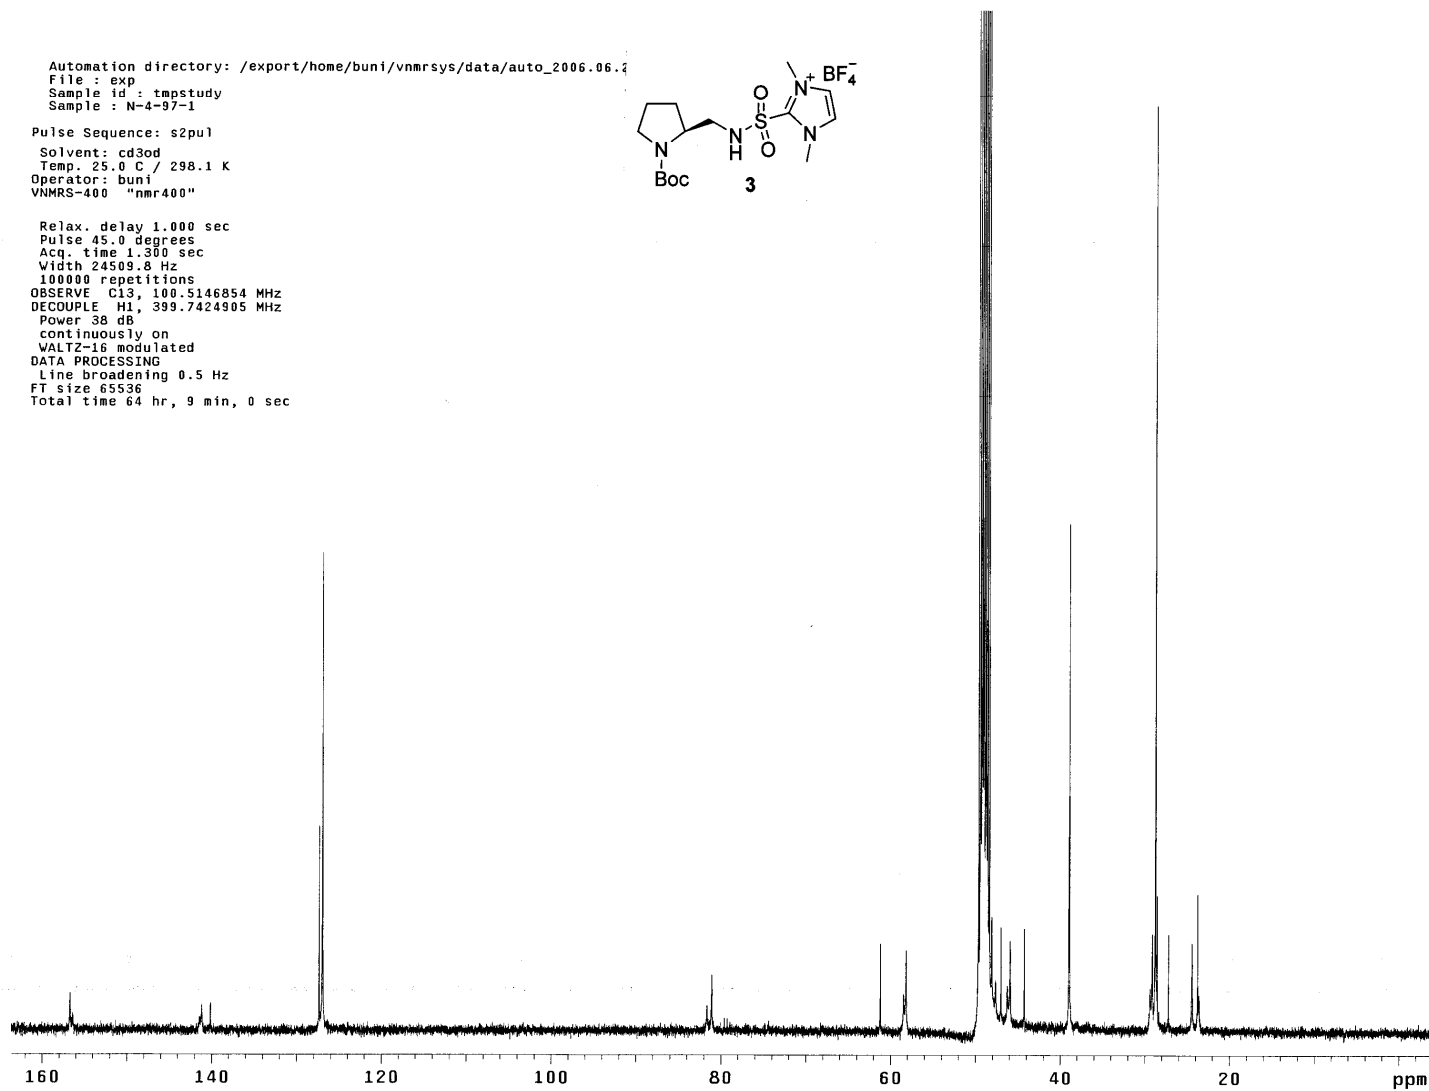

Automation directory: /export/home/buni/vnmrsys/data/auto\_2006.06.22  
 File : exp  
 Sample id : tmpstudy  
 Sample : N-4-91-3

Pulse Sequence: s2pul  
 Solvent: cd3od  
 Temp. 25.0 C / 298.1 K  
 Operator: buni  
 VNMR5-400 "nmr400"

Relax. delay 1.000 sec  
 Pulse 45.0 degrees  
 Acq. time 2.049 sec  
 Width 6410.3 Hz  
 8 repetitions  
 OBSERVE H1, 399.7404915 MHz  
 DATA PROCESSING  
 Line broadening 0.2 Hz  
 FT size 65536  
 Total time 0 min, 30 sec

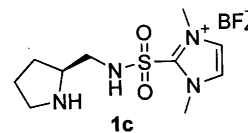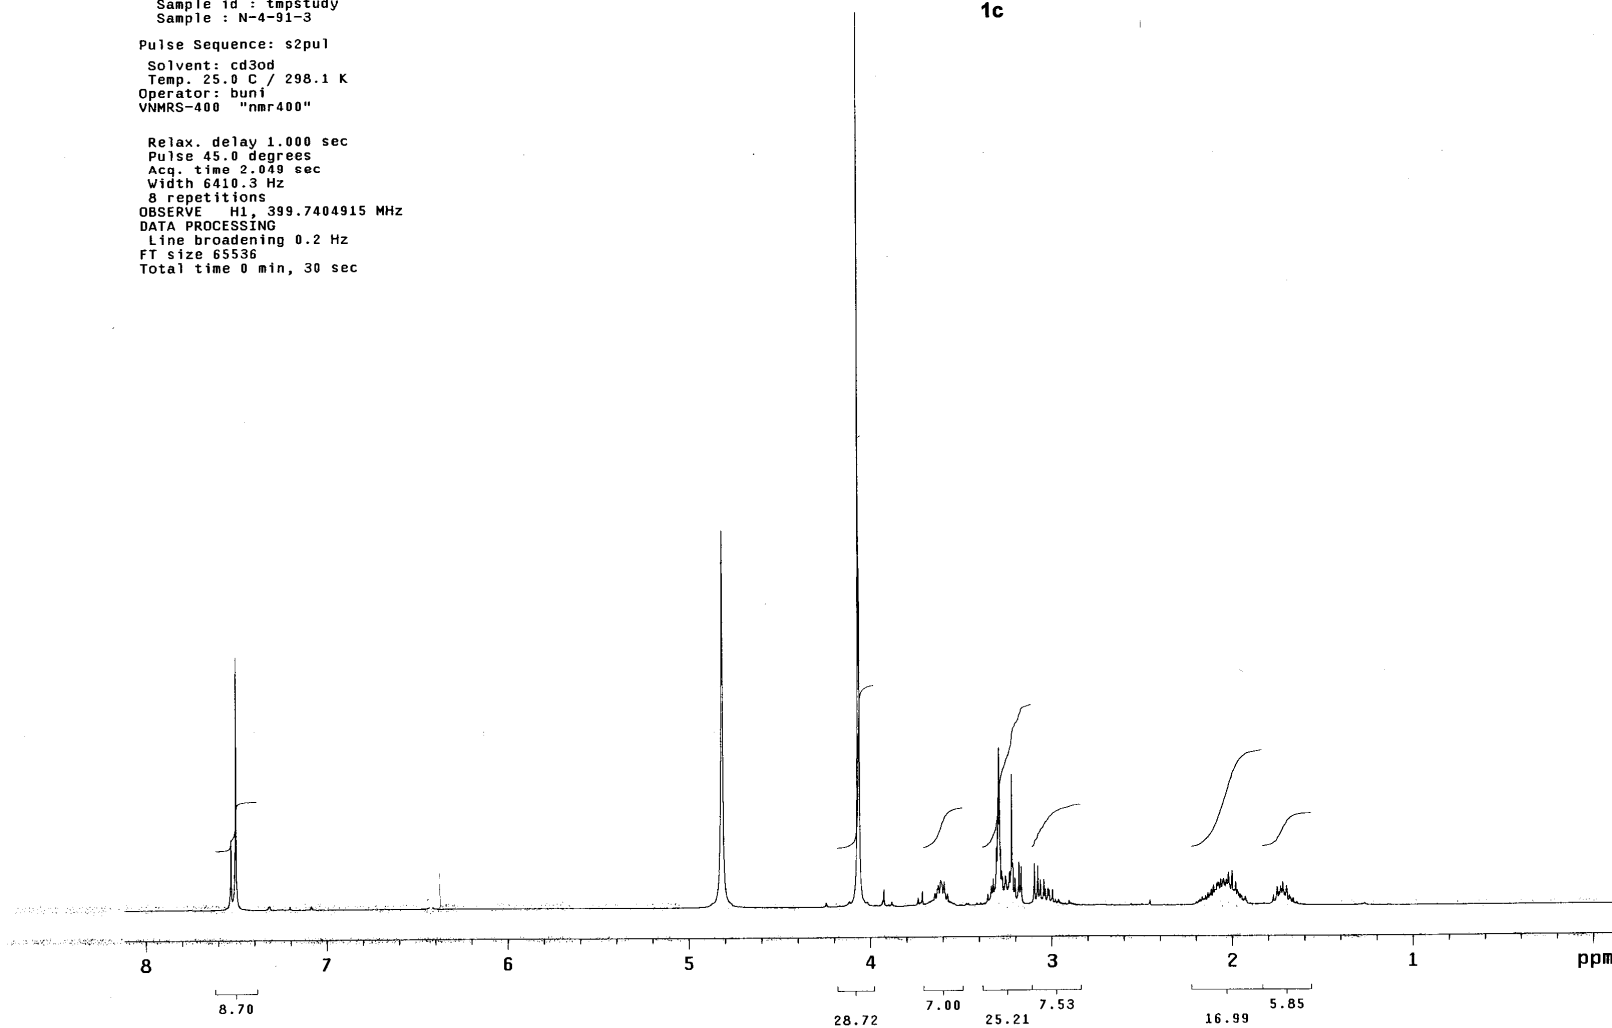

Automation directory: /export/home/buni/vnmrsys/data/auto\_2006.0  
File : exp  
Sample id : tmpstudy  
Sample : N-4-91-3

Pulse Sequence: s2pu1  
Solvent: cd3od  
Temp. 25.0 C / 298.1 K  
Operator: buni  
VNMRS-400 "nmr400"

Relax. delay 1.000 sec  
Pulse 45.0 degrees  
Acq. time 1.300 sec  
Width 24509.8 Hz  
32352 repetitions  
OBSERVE C13, 100.5146847 MHz  
DECOUPLE H1, 399.7424905 MHz  
Power 38 dB  
continuously on  
WALTZ-16 modulated  
DATA PROCESSING  
Line broadening 0.5 Hz  
FT size 65536  
Total time 64 hr, 9 min, 0 sec

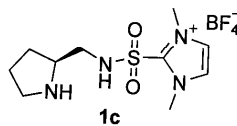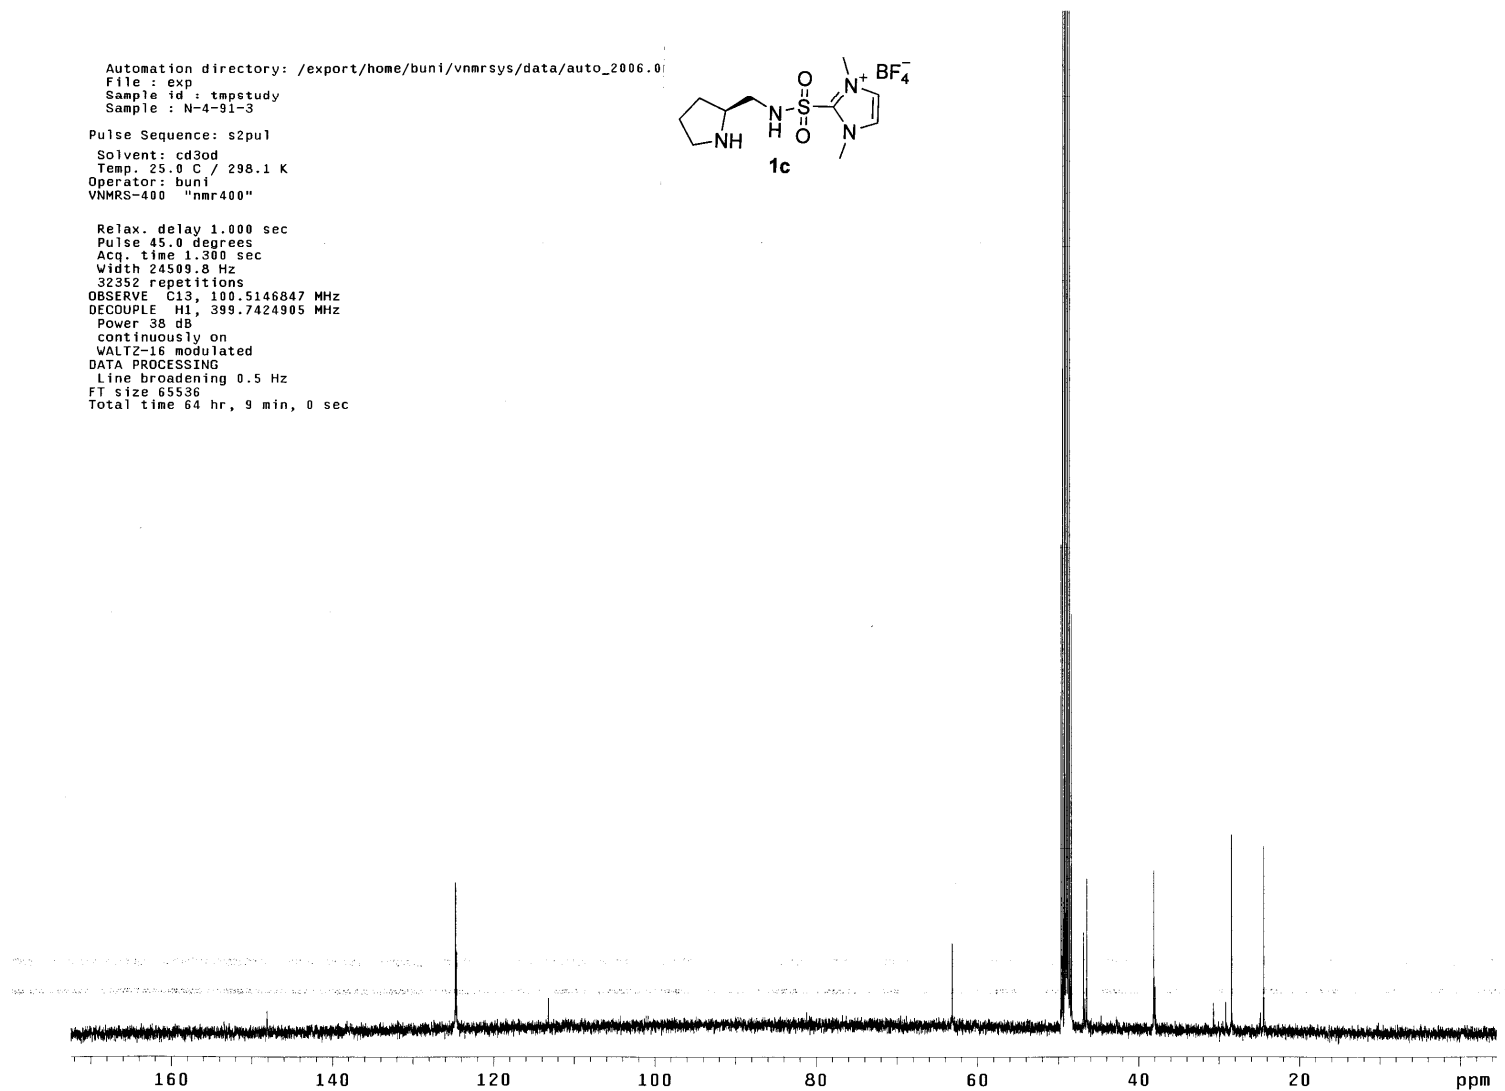

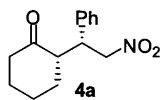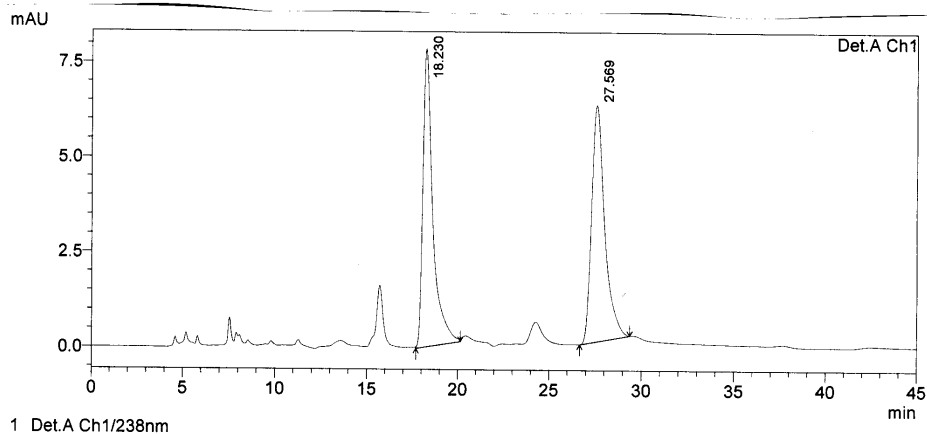

PeakTable

| Peak# | Ret. Time | Area   | Height | Area %  | Height % |
|-------|-----------|--------|--------|---------|----------|
| 1     | 18.230    | 297529 | 7843   | 49.223  | 55.775   |
| 2     | 27.569    | 306918 | 6218   | 50.777  | 44.225   |
| Total |           | 604447 | 14061  | 100.000 | 100.000  |

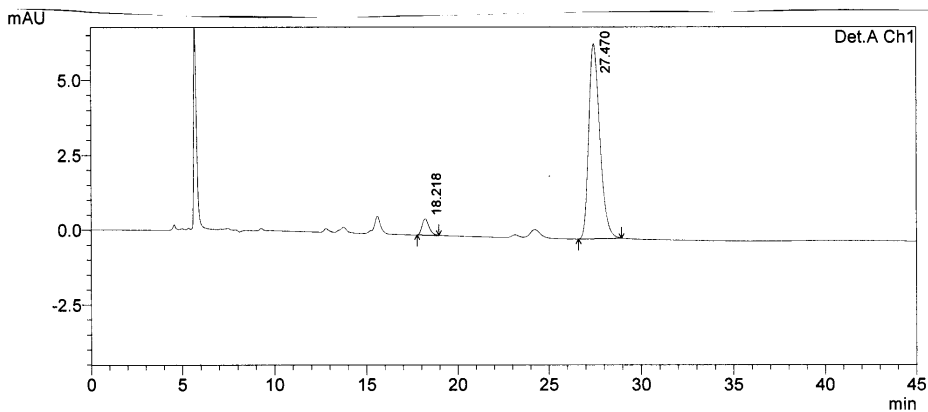

PeakTable

| Peak# | Ret. Time | Area   | Height | Area %  | Height % |
|-------|-----------|--------|--------|---------|----------|
| 1     | 18.218    | 14410  | 543    | 5.035   | 7.704    |
| 2     | 27.470    | 271767 | 6502   | 94.965  | 92.296   |
| Total |           | 286177 | 7044   | 100.000 | 100.000  |

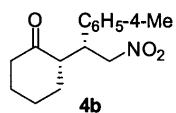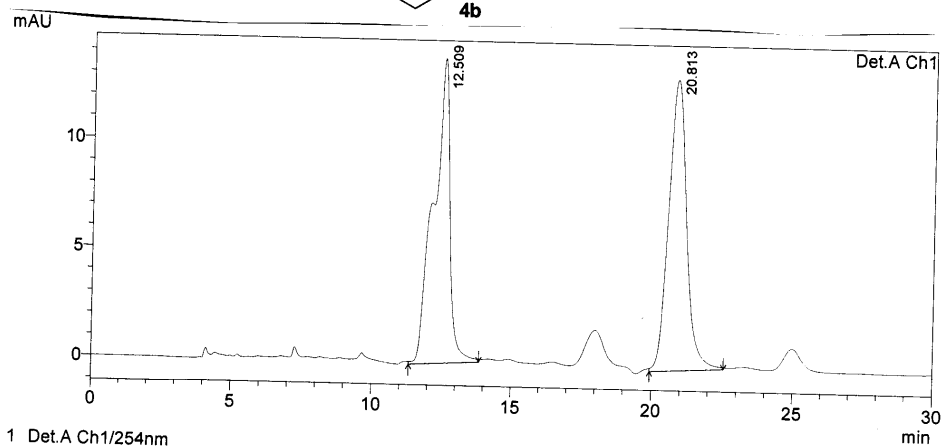

PeakTable

| Peak# | Ret. Time | Area    | Height | Area %  | Height % |
|-------|-----------|---------|--------|---------|----------|
| 1     | 12.509    | 570295  | 13906  | 49.261  | 51.167   |
| 2     | 20.813    | 587399  | 13272  | 50.739  | 48.833   |
| Total |           | 1157694 | 27178  | 100.000 | 100.000  |

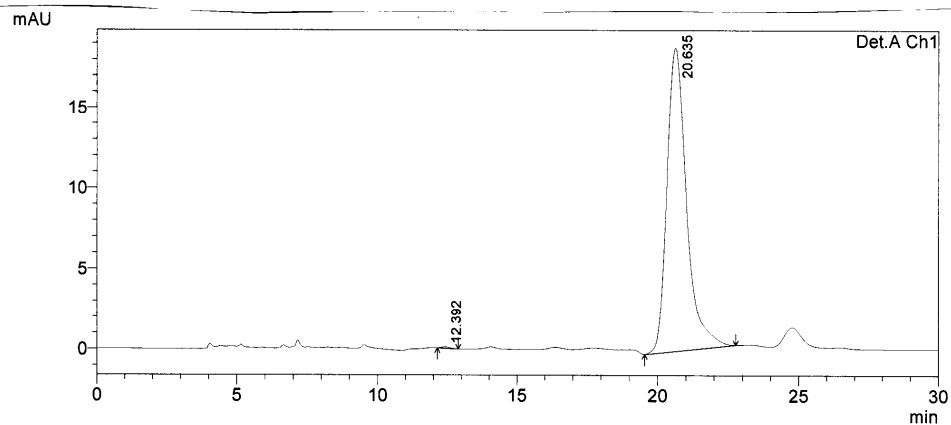

PeakTable

| Peak# | Ret. Time | Area   | Height | Area %  | Height % |
|-------|-----------|--------|--------|---------|----------|
| 1     | 12.392    | 1589   | 82     | 0.174   | 0.435    |
| 2     | 20.635    | 910061 | 18852  | 99.826  | 99.565   |
| Total |           | 911651 | 18935  | 100.000 | 100.000  |

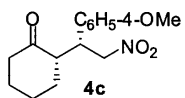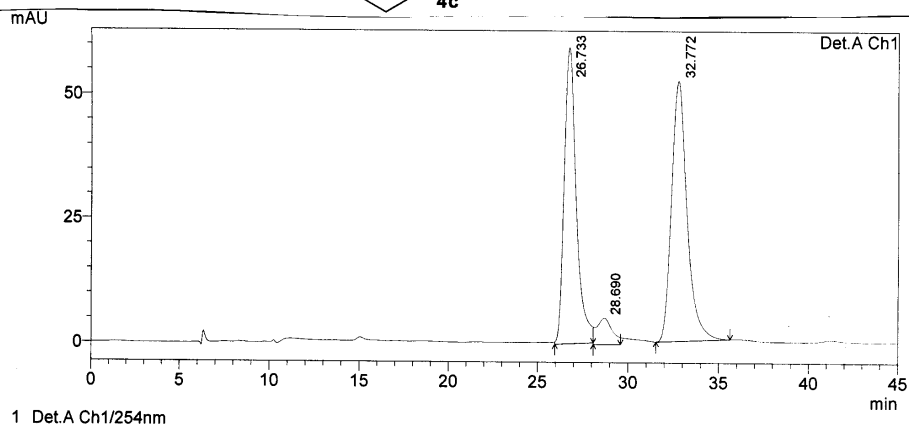

1 Det.A Ch1/254nm

PeakTable

Detector A Ch1 254nm

| Peak# | Ret. Time | Area    | Height | Area %  | Height % |
|-------|-----------|---------|--------|---------|----------|
| 1     | 26.733    | 2761327 | 59448  | 44.584  | 50.786   |
| 2     | 28.690    | 315930  | 5264   | 5.101   | 4.497    |
| 3     | 32.772    | 3116277 | 52345  | 50.315  | 44.718   |
| Total |           | 6193534 | 117057 | 100.000 | 100.000  |

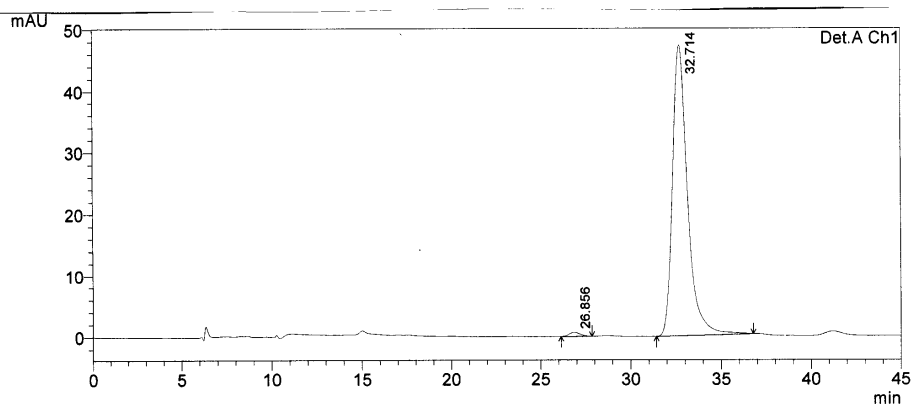

1 Det.A Ch1/254nm

PeakTable

Detector A Ch1 254nm

| Peak# | Ret. Time | Area    | Height | Area %  | Height % |
|-------|-----------|---------|--------|---------|----------|
| 1     | 26.856    | 27003   | 649    | 0.985   | 1.355    |
| 2     | 32.714    | 2713152 | 47264  | 99.015  | 98.645   |
| Total |           | 2740155 | 47913  | 100.000 | 100.000  |

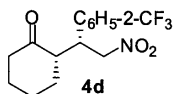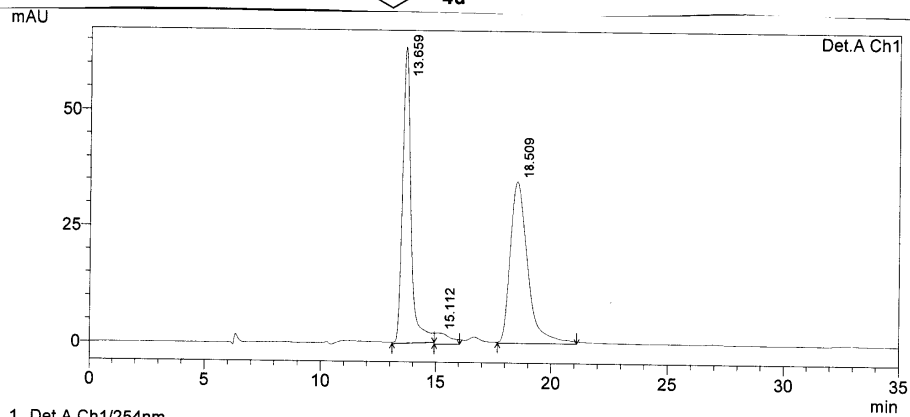

1 Det.A Ch1/254nm

Detector A Ch1 254nm

| Peak# | Ret. Time | Area    | Height | Area %  | Height % |
|-------|-----------|---------|--------|---------|----------|
| 1     | 13.659    | 1637430 | 63585  | 45.840  | 63.250   |
| 2     | 15.112    | 113248  | 2331   | 3.170   | 2.319    |
| 3     | 18.509    | 1821380 | 34613  | 50.990  | 34.431   |
| Total |           | 3572059 | 100529 | 100.000 | 100.000  |

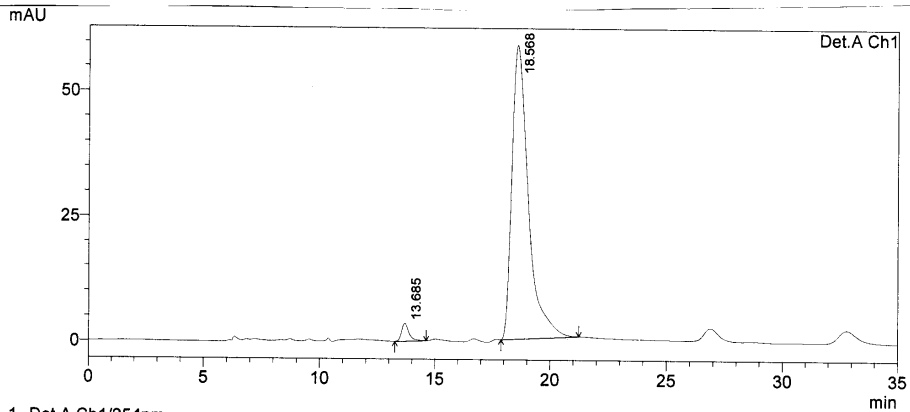

1 Det.A Ch1/254nm

Detector A Ch1 254nm

| Peak# | Ret. Time | Area    | Height | Area %  | Height % |
|-------|-----------|---------|--------|---------|----------|
| 1     | 13.685    | 78532   | 3533   | 2.632   | 5.660    |
| 2     | 18.568    | 2905428 | 58898  | 97.368  | 94.340   |
| Total |           | 2983960 | 62432  | 100.000 | 100.000  |

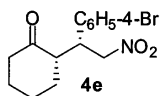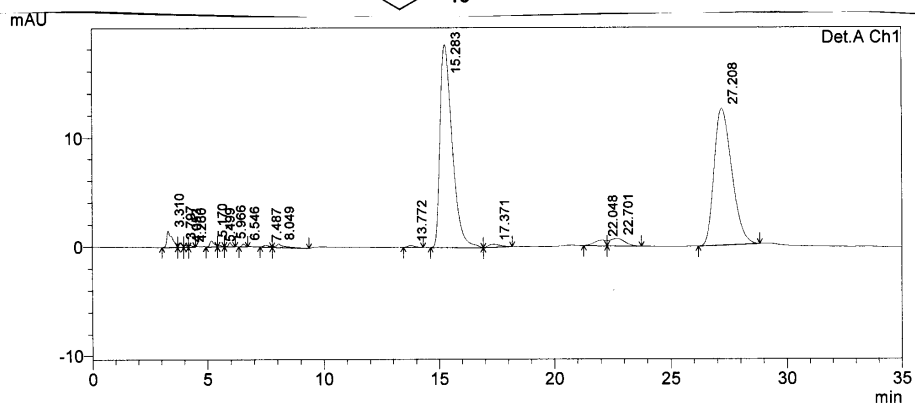

1 Det.A Ch1/254nm

PeakTable

| Peak# | Ret. Time | Area   | Height | Area % | Height % |
|-------|-----------|--------|--------|--------|----------|
| 12    | 15.283    | 681347 | 18507  | 46.543 | 50.489   |
| 13    | 17.371    | 10238  | 287    | 0.699  | 0.783    |
| 14    | 22.048    | 17882  | 499    | 1.221  | 1.361    |
| 15    | 22.701    | 30042  | 667    | 2.052  | 1.821    |
| 16    | 27.208    | 664036 | 12538  | 45.360 | 34.205   |

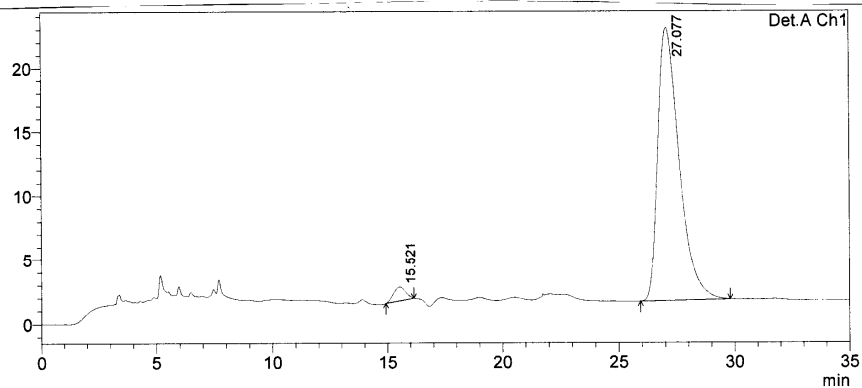

1 Det.A Ch1/254nm

PeakTable

| Peak# | Ret. Time | Area    | Height | Area %  | Height % |
|-------|-----------|---------|--------|---------|----------|
| 1     | 15.521    | 39403   | 1083   | 2.813   | 4.831    |
| 2     | 27.077    | 1361455 | 21332  | 97.187  | 95.169   |
| Total |           | 1400857 | 22415  | 100.000 | 100.000  |



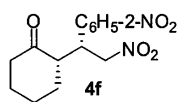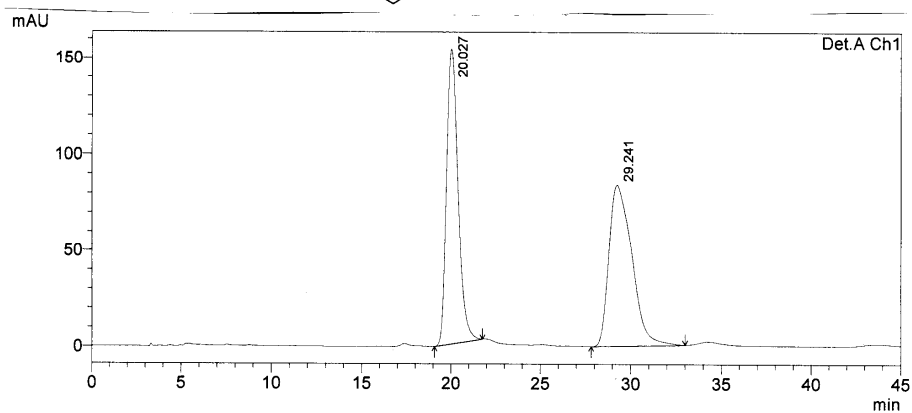

1 Det. A Ch1/238nm

PeakTable

Detector A Ch1 238nm

| Peak# | Ret. Time | Area     | Height | Area %  | Height % |
|-------|-----------|----------|--------|---------|----------|
| 1     | 20.027    | 6905169  | 153658 | 48.240  | 64.635   |
| 2     | 29.241    | 7409114  | 84073  | 51.760  | 35.365   |
| Total |           | 14314284 | 237731 | 100.000 | 100.000  |

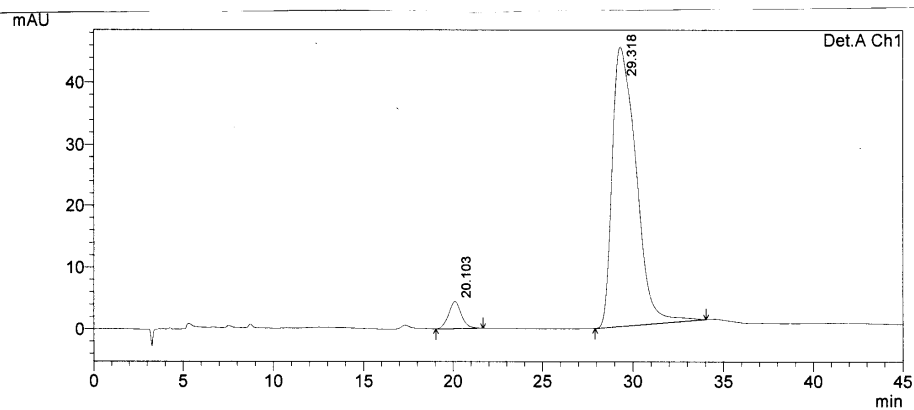

1 Det. A Ch1/238nm

PeakTable

Detector A Ch1 238nm

| Peak# | Ret. Time | Area    | Height | Area %  | Height % |
|-------|-----------|---------|--------|---------|----------|
| 1     | 20.103    | 219080  | 4400   | 5.010   | 8.853    |
| 2     | 29.318    | 4153882 | 45301  | 94.990  | 91.147   |
| Total |           | 4372961 | 49701  | 100.000 | 100.000  |

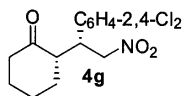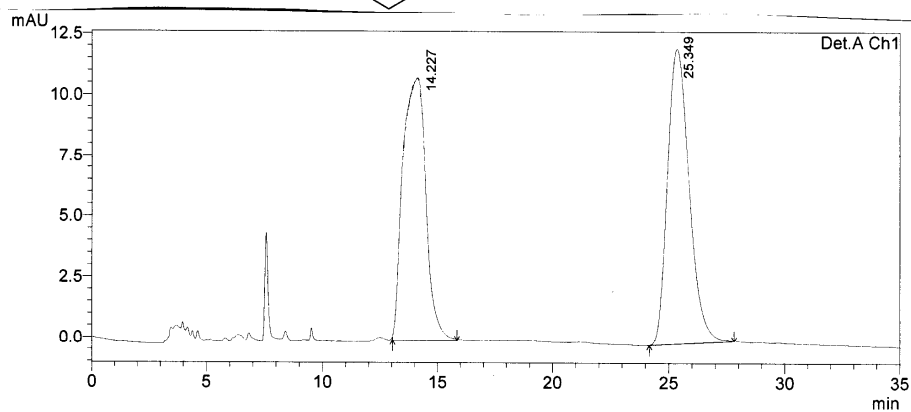

1 Det.A Ch1/238nm

PeakTable

Detector A Ch1 238nm

| Peak# | Ret. Time | Area    | Height | Area %  | Height % |
|-------|-----------|---------|--------|---------|----------|
| 1     | 14.227    | 681543  | 10129  | 46.319  | 45.446   |
| 2     | 25.349    | 789869  | 12159  | 53.681  | 54.554   |
| Total |           | 1471412 | 22288  | 100.000 | 100.000  |

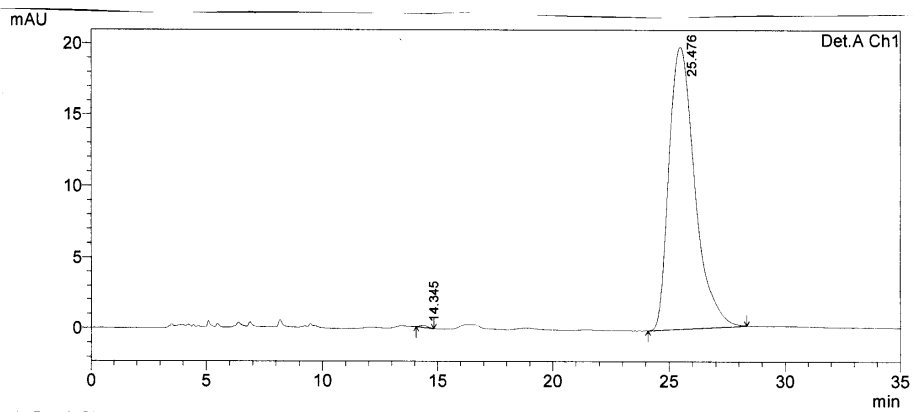

1 Det.A Ch1/238nm

PeakTable

Detector A Ch1 238nm

| Peak# | Ret. Time | Area    | Height | Area %  | Height % |
|-------|-----------|---------|--------|---------|----------|
| 1     | 14.345    | 2966    | 132    | 0.193   | 0.661    |
| 2     | 25.476    | 1531692 | 19808  | 99.807  | 99.339   |
| Total |           | 1534658 | 19940  | 100.000 | 100.000  |

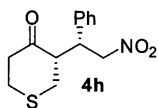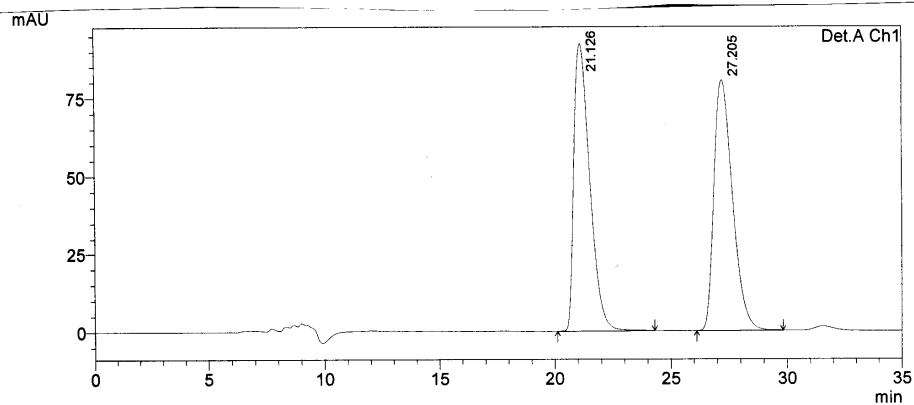

1 Det.A Ch1/254nm

| PeakTable            |           |         |        |         |          |
|----------------------|-----------|---------|--------|---------|----------|
| Detector A Ch1 254nm |           |         |        |         |          |
| Peak#                | Ret. Time | Area    | Height | Area %  | Height % |
| 1                    | 21.126    | 4390428 | 92368  | 49.640  | 53.502   |
| 2                    | 27.205    | 4454104 | 80275  | 50.360  | 46.498   |
| Total                |           | 8844531 | 172643 | 100.000 | 100.000  |

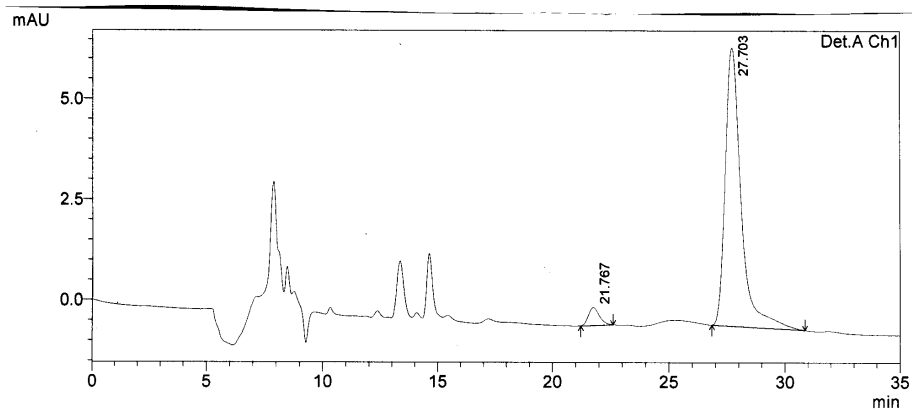

1 Det.A Ch1/254nm

| PeakTable            |           |        |        |         |          |
|----------------------|-----------|--------|--------|---------|----------|
| Detector A Ch1 254nm |           |        |        |         |          |
| Peak#                | Ret. Time | Area   | Height | Area %  | Height % |
| 1                    | 21.767    | 14504  | 443    | 4.214   | 6.005    |
| 2                    | 27.703    | 329677 | 6937   | 95.786  | 93.995   |
| Total                |           | 344180 | 7381   | 100.000 | 100.000  |

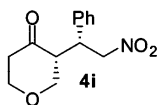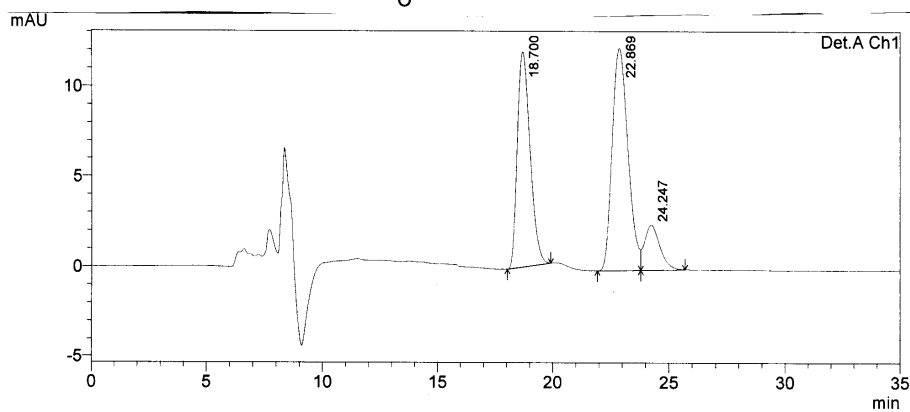

PeakTable

| Peak# | Ret. Time | Area    | Height | Area %  | Height % |
|-------|-----------|---------|--------|---------|----------|
| 1     | 18.700    | 460289  | 11901  | 39.765  | 44.590   |
| 2     | 22.869    | 582657  | 12298  | 50.337  | 46.078   |
| 3     | 24.247    | 114563  | 2491   | 9.897   | 9.332    |
| Total |           | 1157509 | 26689  | 100.000 | 100.000  |

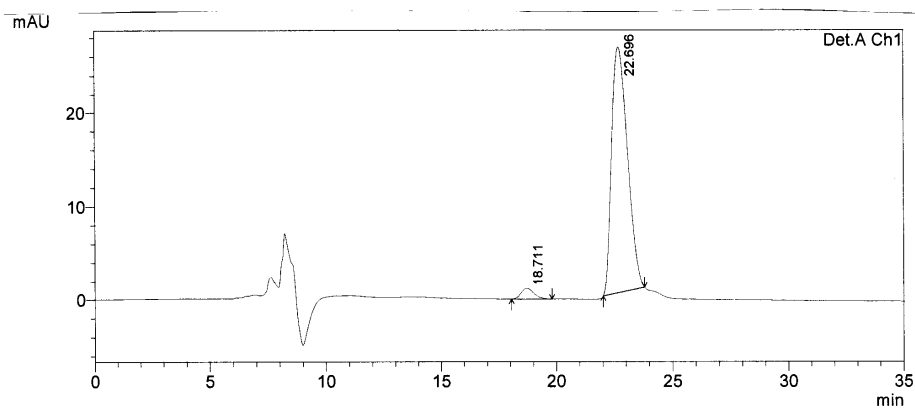

PeakTable

| Peak# | Ret. Time | Area    | Height | Area %  | Height % |
|-------|-----------|---------|--------|---------|----------|
| 1     | 18.711    | 43172   | 1136   | 3.331   | 4.133    |
| 2     | 22.696    | 1252943 | 26347  | 96.669  | 95.867   |
| Total |           | 1296115 | 27483  | 100.000 | 100.000  |

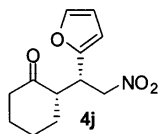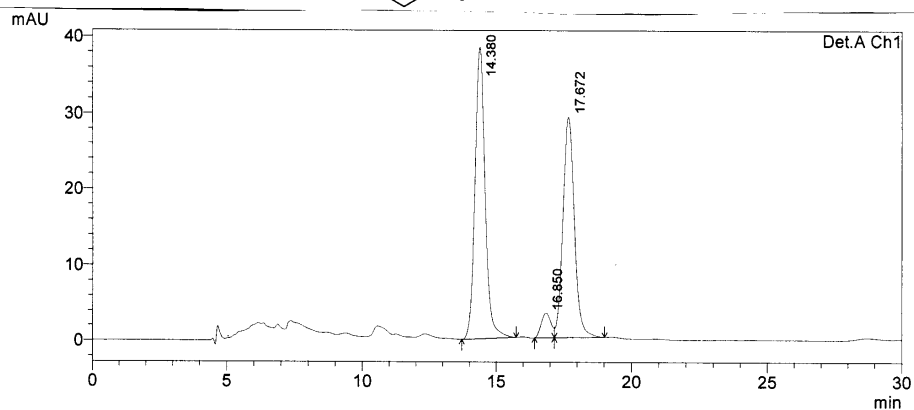

1 Det.A Ch1/220nm

Detector A Ch1 220nm

| Peak# | Ret. Time | Area    | Height | Area %  | Height % |
|-------|-----------|---------|--------|---------|----------|
| 1     | 14.380    | 1009006 | 38356  | 51.804  | 54.217   |
| 2     | 16.850    | 80865   | 3270   | 4.152   | 4.623    |
| 3     | 17.672    | 857855  | 29119  | 44.044  | 41.160   |
| Total |           | 1947727 | 70746  | 100.000 | 100.000  |

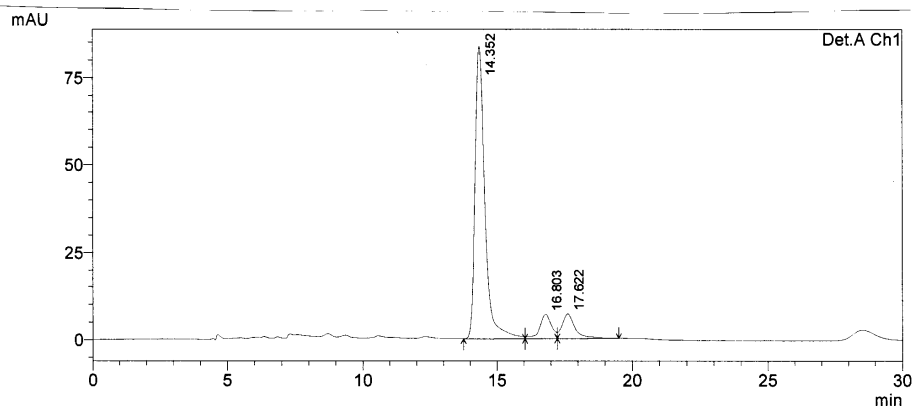

1 Det.A Ch1/220nm

PeakTable

Detector A Ch1 220nm

| Peak# | Ret. Time | Area    | Height | Area %  | Height % |
|-------|-----------|---------|--------|---------|----------|
| 1     | 14.352    | 2127030 | 83677  | 82.889  | 85.833   |
| 2     | 16.803    | 206996  | 6833   | 8.066   | 7.009    |
| 3     | 17.622    | 232091  | 6978   | 9.044   | 7.158    |
| Total |           | 2566117 | 97489  | 100.000 | 100.000  |

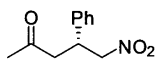

4l

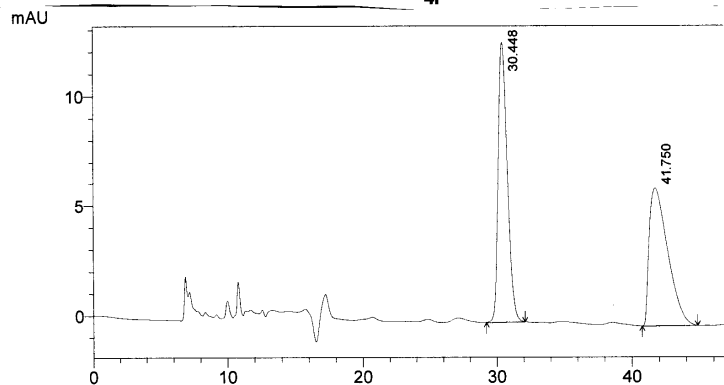

1 Det.A Ch1/254nm

PeakTable

Detector A Ch1 254nm

| Peak# | Ret. Time | Area    | Height | Area %  | Height % |
|-------|-----------|---------|--------|---------|----------|
| 1     | 30.448    | 604929  | 12729  | 50.402  | 67.063   |
| 2     | 41.750    | 595282  | 6252   | 49.598  | 32.937   |
| Total |           | 1200210 | 18981  | 100.000 | 100.000  |

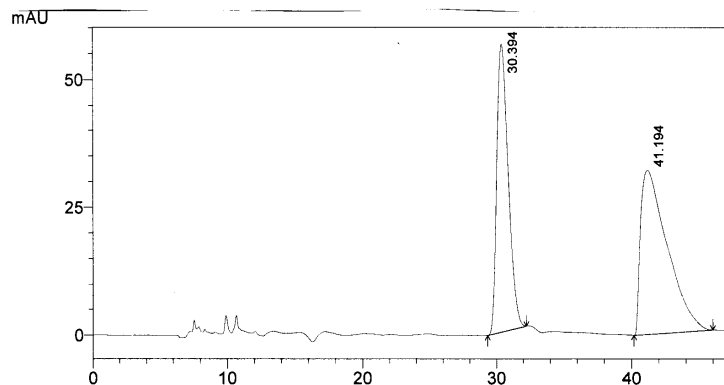

1 Det.A Ch1/254nm

PeakTable

Detector A Ch1 254nm

| Peak# | Ret. Time | Area    | Height | Area %  | Height % |
|-------|-----------|---------|--------|---------|----------|
| 1     | 30.394    | 3345902 | 56251  | 43.237  | 63.719   |
| 2     | 41.194    | 4392597 | 32028  | 56.763  | 36.281   |
| Total |           | 7738499 | 88279  | 100.000 | 100.000  |

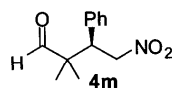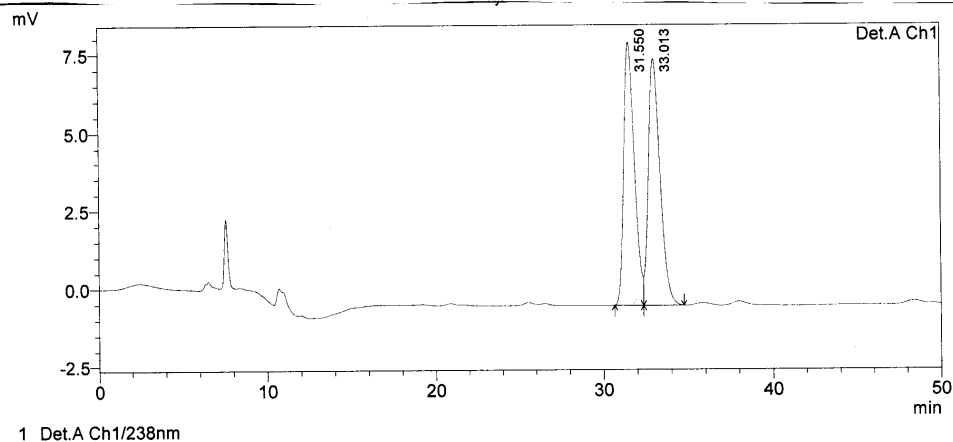

PeakTable

| Peak# | Ret. Time | Area   | Height | Area %  | Height % |
|-------|-----------|--------|--------|---------|----------|
| 1     | 31.550    | 366765 | 8420   | 49.202  | 51.618   |
| 2     | 33.013    | 378665 | 7892   | 50.798  | 48.382   |
| Total |           | 745430 | 16311  | 100.000 | 100.000  |

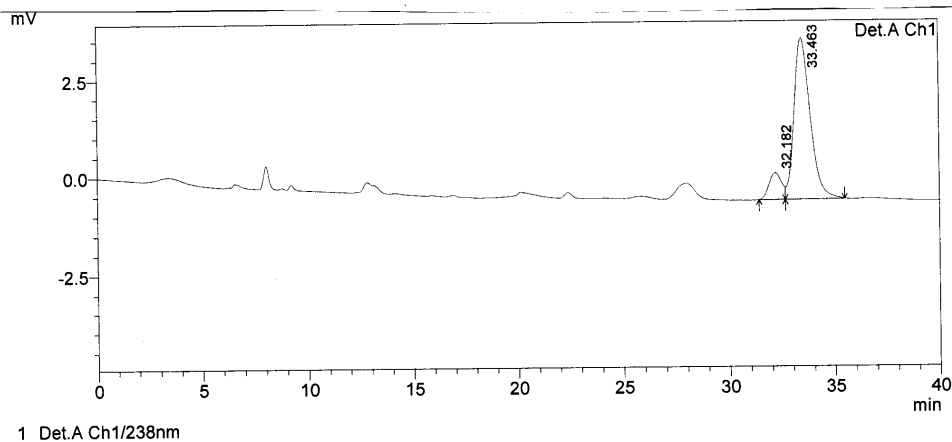

PeakTable

| Peak# | Ret. Time | Area   | Height | Area %  | Height % |
|-------|-----------|--------|--------|---------|----------|
| 1     | 32.182    | 28291  | 682    | 11.390  | 14.192   |
| 2     | 33.463    | 220104 | 4123   | 88.610  | 85.808   |
| Total |           | 248395 | 4805   | 100.000 | 100.000  |
